# Supplementary material for: Synthesis and electrochemical properties of Li1.3Nb0.3V0.4O2 as a positive electrode material for rechargeable lithium batteries
Source: Royal Society of Chemistry journal article supplement (doi:10.1039/c5cc08034g), 2015-12-08
Supplement: c5cc08034g1.pdf [file c5cc08034g1.pdf]

**Supporting Information for**

**Synthesis and Electrochemical Properties of  $\text{Li}_{1.3}\text{Nb}_{0.3}\text{V}_{0.4}\text{O}_2$  as a Positive Electrode Material for  
Rechargeable Lithium Batteries**

Naoaki Yabuuchi,<sup>1\*</sup> Mitsue Takeuchi,<sup>2</sup> Shinichi Komaba,<sup>2</sup> Shinnosuke Ichikawa,<sup>3</sup>

Tetsuya Ozaki<sup>3</sup> and Tokuo Inamasu<sup>3</sup>

<sup>1</sup>Department of Green and Sustainable Chemistry, Tokyo Denki University

5 Senju Asahi-Cho, Adachi, Tokyo 120-8551, Japan

<sup>2</sup>Department of Applied Chemistry, Tokyo University of Science,

1-3 Kagurazaka, Shinjuku, Tokyo 162-8601, Japan

<sup>3</sup>R&D Center, GS Yuasa International Ltd.,

1 Inobanba-cho, Nishinosho, Kisshoin, Minami-ku, Kyoto 601-8520, Japan

\*corresponding author, e-mail; [yabuuchi@mail.dendai.ac.jp](mailto:yabuuchi@mail.dendai.ac.jp)

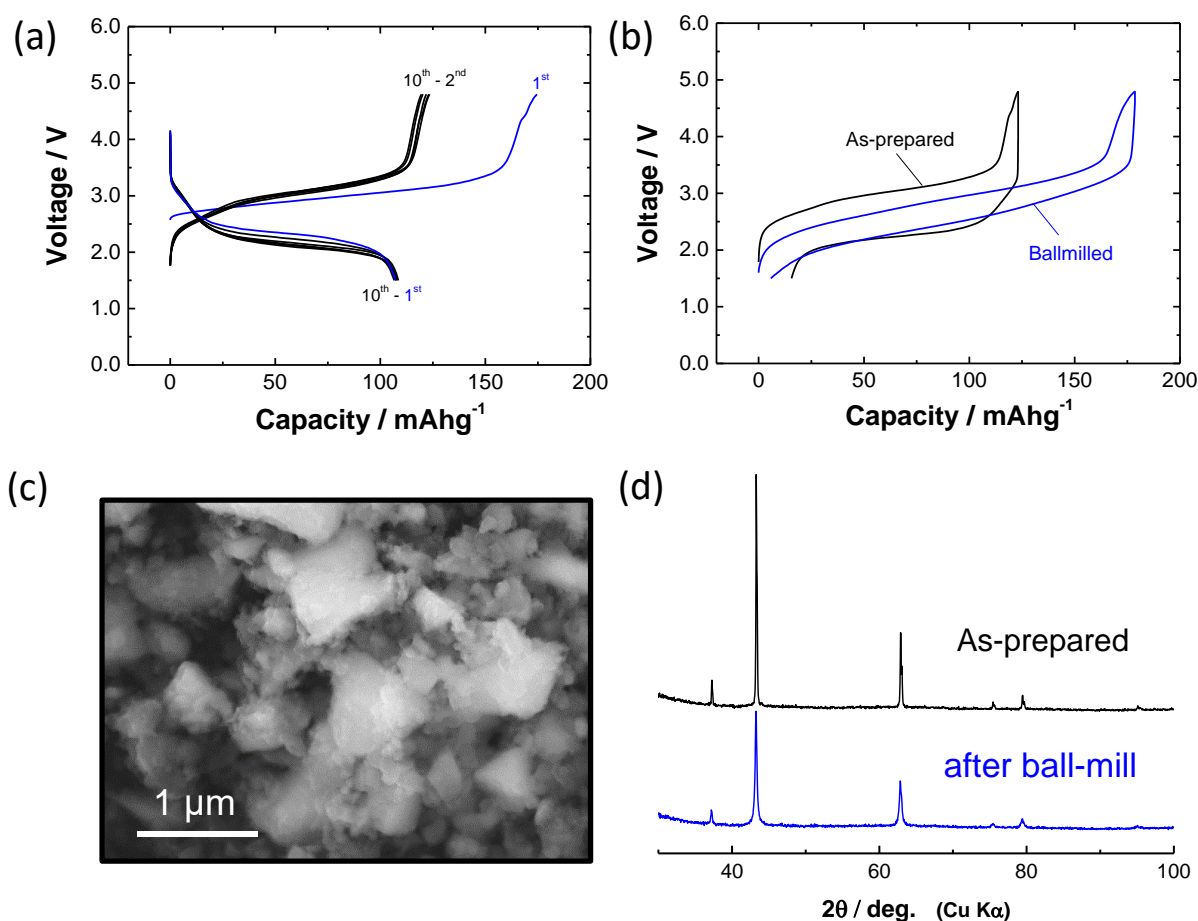

**Figure S1.** (a) Electrode performance of as-prepared  $\text{Li}_{1.3-x}\text{Nb}_{0.3}\text{V}_{0.4}\text{O}_2$  without the ballmilling process. The Li cell was cycled in the voltage range of 1.5 – 4.8 V at a rate of 10 mA g<sup>-1</sup> at room temperature. Electrode performance of as-prepared and ballmilled  $\text{Li}_{1.3-x}\text{Nb}_{0.3}\text{V}_{0.4}\text{O}_2$  is compared in (b). Charge/discharge curves for 2<sup>nd</sup> cycles are shown in (b). (c) Particle morphology of ball-milled sample observed by SEM. Particle size was reduced from approximately 3 – 5 μm to sub-micrometer size. Uniform distribution of nanosized carbon is also noted. Polarization as electrode materials is effectively enhanced by mechanical ball-milling as shown in (b). (d) Comparison of XRD patterns of  $\text{Li}_{1.3-x}\text{Nb}_{0.3}\text{V}_{0.4}\text{O}_2$  before and after ball-milling with carbon. Particle size and crystallinity of the sample are lowered by ball-milling process.
